# Supplementary material for: Facile synthesis of O-doped carbon nitride nanofibers for two-step single-electron oxygen reduction to H2O2
Source: Royal Society of Chemistry journal article supplement (doi:10.1039/d3nj03170e), 2023-01-01
Supplement: d3nj03170e1.pdf [file d3nj03170e1.pdf]

## Supporting Information

### **Facile synthesis of O-doped carbon nitride nanofibers for two-step single-electron oxygen reduction to H<sub>2</sub>O<sub>2</sub>**

Tingshuo Ji,<sup>a</sup> Xue Wei,<sup>a</sup> Juanjuan Wang,<sup>a</sup> Yuanjing Fan,<sup>a</sup> Ziwei Wang,<sup>a</sup> Shengxian Zhou,<sup>a</sup> Xuefeng Wei<sup>\*b</sup>, Baocheng Yang<sup>\*a</sup> and Yanzhen Guo<sup>\*a</sup>

<sup>a</sup>Henan Provincial Key Laboratory of Nanocomposites and Applications, Institute of Nanostructured Functional Materials, Huanghe Science and Technology College, Zhengzhou 450006, China. E-mail: baochengyang@infm.hhstu.edu.cn; yzguo@hhstu.edu.cn

<sup>b</sup>College of Chemical Engineering & Pharmaceutics, Henan University of Science and Technology, Luoyang, 471023, PR China. E-mail: xfwei@haust.edu.cn

## **1. Experimental details**

### **1.1. Preparation of the photocatalysts**

The CNF photocatalyst was synthesized according to a previous report with slight modification.<sup>[S1]</sup> Typically, cyanuric chloride (4.0 mmol) and melamine (2.0 mmol) were successively added into 30 mL of acetonitrile, followed by ultrasonic dispersion. Then the mixture was stirring for 24 h at 25°C, and solvothermally reacted for 24 at 180°C. The precipitate was then collected and centrifuged several times with ultrapure water and anhydrous ethanol to remove impurities on the surface. The product was then dried in a 60°C oven.

The O-doped g-C<sub>3</sub>N<sub>4</sub> samples were synthesized through one-pot solvothermal method with addition of the representative amino acid. Cyanuric chloride (4.0 mmol) and melamine (2.0 mmol) were first dissolved in 30 mL of acetonitrile. Then a certain amount of amino acid (L-arginine, L-cysteine or L-lysine) was added into the above mixture. The O-doped g-C<sub>3</sub>N<sub>4</sub> samples of ACNx, CCNx or LCNx were respectively acquired with the same solvothermal procedure with that of CNF. In the abbreviations of ACNx, CCNx and LCNx, x denotes the addition amount (mmol) of the amino acids. Especially, ACN, CCN, and LCN are abbreviated for ACN0.1, CCN0.1, and LCN0.1.

### **1.2 Characterizations**

The morphologies of the catalysts were observed on scanning electron microscope (SEM, Quanta 250 FEG FEI) and transmission electron microscope (TEM) (Tecnai G2 20

TEM). The light harvesting capacities of the samples were characterized by their absorption spectra on a Hitachi ultraviolet/visible/near-infrared (UV-vis-NIR) spectrophotometer equipped with an integrating sphere with BaSO<sub>4</sub> as a base. The crystalline characteristics of the samples were investigated by collecting their X-ray diffraction (XRD) patterns on a Bruker D8 Advance diffractometer with tube voltage and current of 40 kV and 40 mA, respectively. The Fourier transform infrared (FTIR) spectra of the samples were collected on a Thermo Scientific Nicolet iS5 infrared spectrophotometer using potassium bromide pellet technique. X-ray photoelectron spectroscopy (XPS) measurements were recorded on an Escalab 250 Xi (Thermo Fisher Scientific) system with Al K $\alpha$  ( $h\nu = 1486.6$  eV) as the X-ray source. The photoluminescence (PL) measurements (Hitachi F-4600 spectrophotometer) were carried out to investigate the radiative recombination of the photogenerated charge carriers. The transient-state photoluminescence (TRPL) spectra were recorded on Edinburgh Instruments FLS980 spectrophotometer with excitation and emission wavelength of 350 and 455 nm, respectively. N<sub>2</sub> adsorption-desorption isotherms, which were used to calculate the Brunauer-Emmett-Teller (BET) specific surface areas, were collected on a Micromeritics ASAP 2020 analyzer. The Solid-state <sup>13</sup>C nuclear magnetic resonance (NMR) was performed on JNM-ECZ600R nuclear magnetic resonance spectrometer. The thermogravimetric analysis was carried out on a thermogravimetric-differential scanning calorimetry analyzer (SDT Q600). O<sub>2</sub>-temperature programmed desorption (O<sub>2</sub>-TPD) was performed on a chemisorption instrument (TP-5080). Electron paramagnetic resonance (EPR) spectra of the samples

were collected on a Bruker EMXnano spectrometer with 5,5-dimethyl-1-pyrroline N-oxide (DMPO) as the trapping agents of  $\bullet\text{O}_2^-$ .

### 1.3 Photocatalytic performance measurements

The photocatalytic performances of the photocatalysts were evaluated through the photogeneration of  $\text{H}_2\text{O}_2$  in a photoreactor by employing a 300 W Xe lamp (CEL-HXF300, CEALIGHT, Beijing, China) equipped with a cut-off filter of 420 nm as the light source. Typically, the photocatalyst (50 mg) was first dispersed into an ethanol aqueous solution (50 mL, 10 vol% ethanol in deionized water) and sonicated for 5 min to ensure the uniformity of the suspension. Then the mixture was bubbled with  $\text{O}_2$  for 20 min to create an oxygen-rich environment before light was turned on. During photocatalytic process, every 1.5 ml of solution was taken out from the reaction mixture with time interval of 0.5 h. The concentration of  $\text{H}_2\text{O}_2$  generated in the reaction solution was determined by a  $\text{Ce}(\text{SO}_4)_2$  titration method with the assistance of UV-vis spectrophotometer. Moreover, the evolution amount of  $\text{H}_2\text{O}_2$  under monochromatic light was measured by replacing the cut-off filter with a bandpass filter. The power intensity of monochromatic light was measured with an optical power meter (CEL-NP2000-2, CEALIGHT, Beijing, China). The apparent quantum yield (AQY) was estimated by the  $\text{H}_2\text{O}_2$  amount generated under monochromatic light and corresponding power density according to the equation:  $\text{AQY} (\%) = (\text{number of reacted electrons/number of incident photons}) \times 100 = (2 \times \text{number of produced } \text{H}_2\text{O}_2 \text{ molecules}) / (\text{number of incident photons}) \times 100$ .

#### 1.4. Photoelectrochemical measurements

The photoelectrochemical measurements were carried out on a CHI 760E electrochemical workstation (Shanghai Chenchua) by using a standard three-electrode system, in which the sample electrode, the Ag/AgCl electrode and the Pt plate electrode were served as the working electrode, the reference electrode and the counter electrode, respectively. The sample electrode was prepared by depositing photocatalyst suspension (10 mg/mL in 5.0 vol% Nafion ethanol solution) on a cleaned fluorine-doped tin oxide (FTO) glass substrate with a surface area of  $1 \times 1 \text{ cm}^2$ . The aqueous  $\text{Na}_2\text{SO}_4$  solution (0.5 M) was used as electrolyte.<sup>[S2]</sup> The normal hydrogen electrode (NHE at pH = 7) can be converted from the reference electrode potential (vs. Ag/AgCl) according to  $E_{\text{NHE}} = E_{\text{Ag/AgCl}} + E^0_{\text{Ag/AgCl}}$ , where  $E^0_{\text{Ag/AgCl}}$  is 0.197 V at 25 °C.<sup>[S3]</sup> The Mott-Schottky curves for flat potential confirmation were measured by impedance-potential method. The photocurrent curves were collected at a potential of 0.2 V (vs. Ag/AgCl) under on-off visible light irradiation. The electrochemical impedance spectroscopy (EIS) tests were performed in the frequency range of 0.01 Hz to 100 kHz.

#### 1.5. Rotating ring-disk electrode (RRDE) measurement

RRDE was employed to measure the electron transfer number and  $\text{H}_2\text{O}_2$  selectivity of CNF and CCN in oxygen reduction process. The electrochemical measurement was carried out in a three-electrode system, in which RRDE, Ag/AgCl and Pt/C were the working, reference and counter electrode.  $\text{O}_2$ -saturated 0.1 M KOH solution was used

as the electrolyte. The catalyst ink on the RRDE working electrode was prepared by dispersing the photocatalyst into an ethanol solution with 5 vol% nafion (10 mg/mL).

The electron transfer number is calculated according to the following formula: <sup>[S4,S5]</sup>

$$n=(4\times|I_d|)/(|I_d|+I_r/N)$$

The H<sub>2</sub>O<sub>2</sub> selectivity is calculated according to the following formula:

$$\text{H}_2\text{O}_2(\%)=(200\times I_r/N)/(|I_d|+I_r/N)$$

Where  $I_r$  is the ring current,  $I_d$  is the disc current, and  $N$  is the collection efficiency ( $N=0.37$ ).

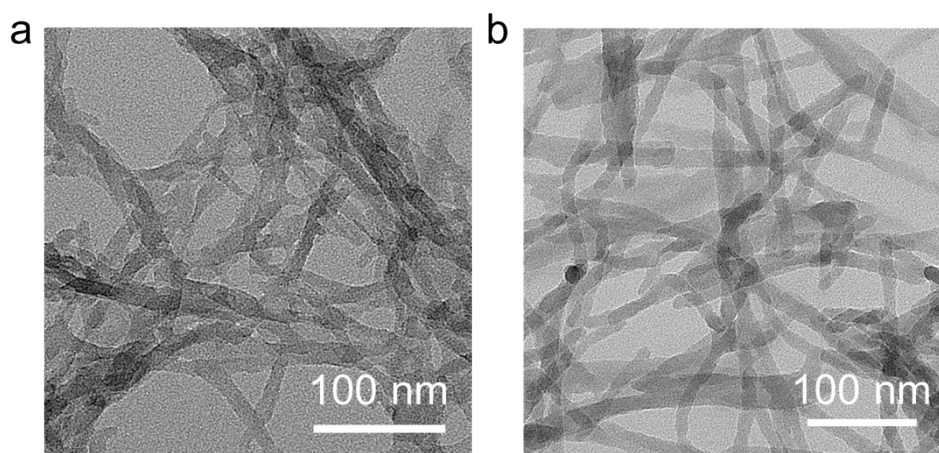

**Fig. S1** TEM images of CNF (a), and CCN (b).

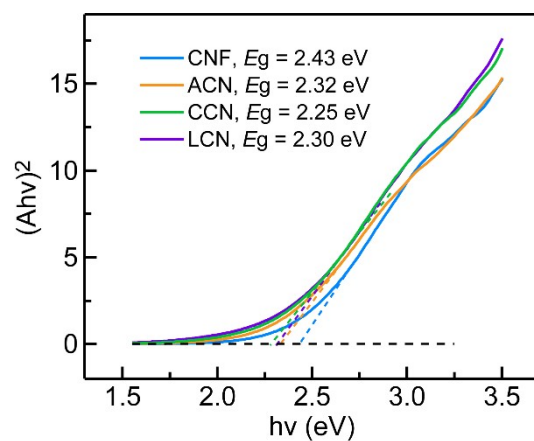

**Fig. S2** Tauc plots of the four samples.

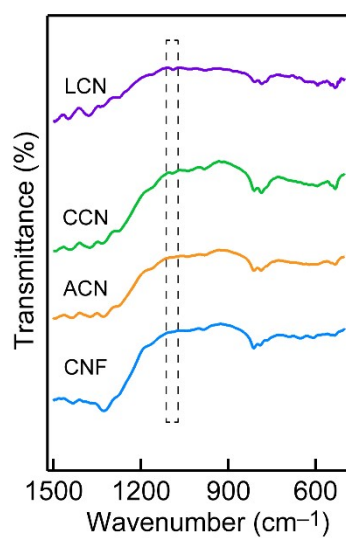

**Fig. S3** Enlarged FTIR spectra of the four samples.

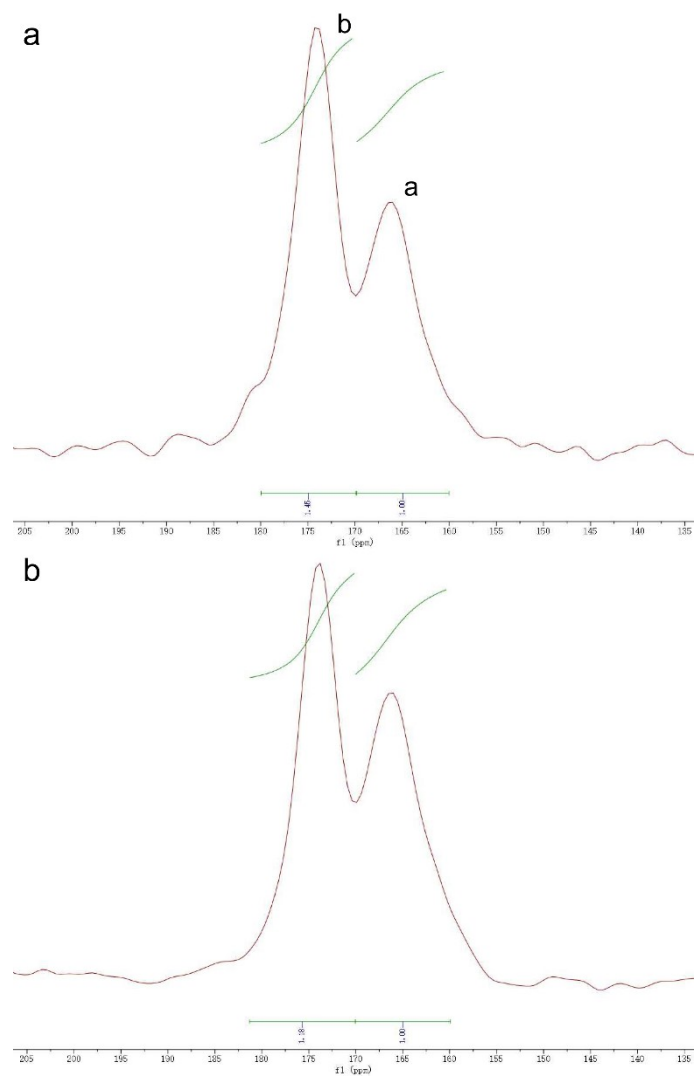

**Fig. S4**  $^{13}\text{C}$  NMR spectra of CNF (a) and CCN (b).

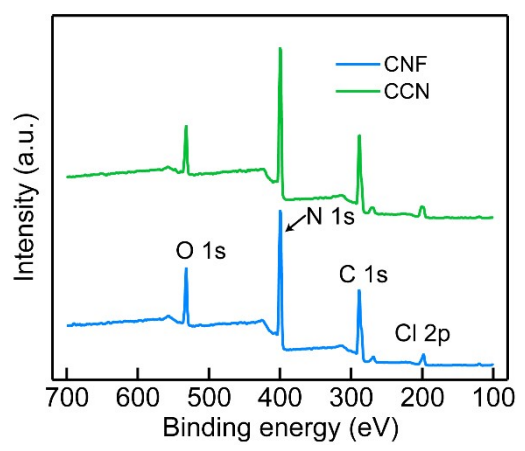

**Fig. S5** The survey XPS spectra of CNF and CCN.



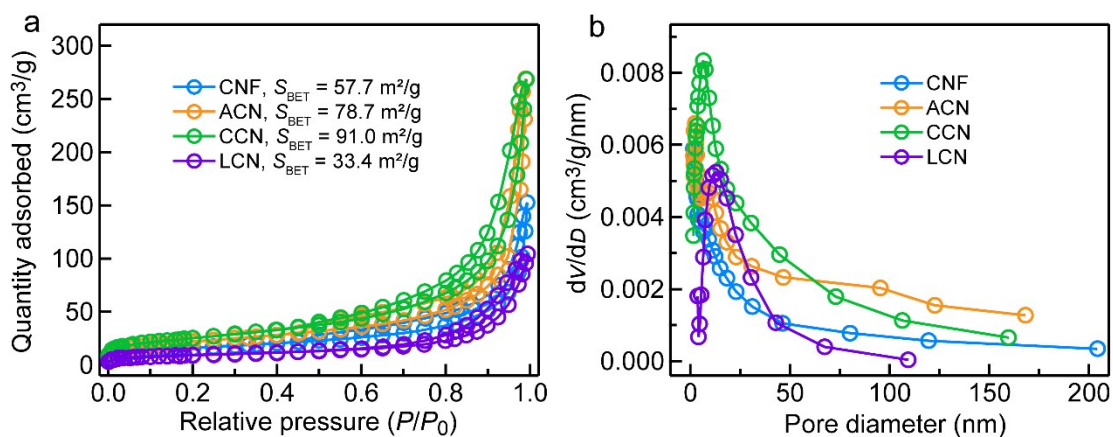

**Fig. S6** N<sub>2</sub> adsorption-desorption isotherms (a) and pore structure characterization (b) of the samples.

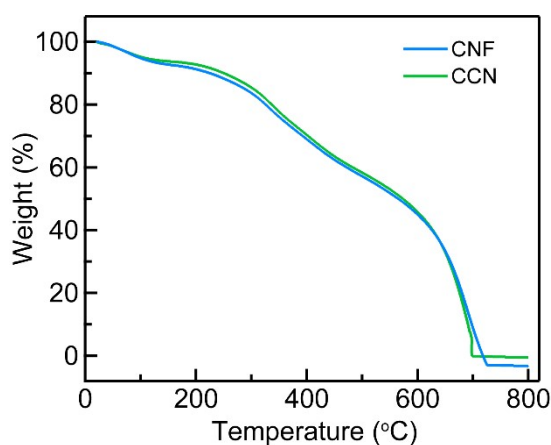

**Fig. S7** Thermogravimetric analysis curves of CNF and CCN.

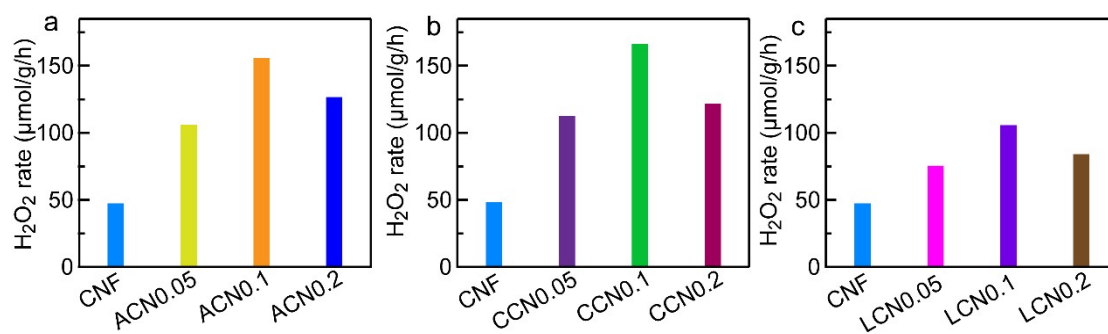

**Fig. S8** The photocatalytic H<sub>2</sub>O<sub>2</sub> generation activity of ACNx (a), CCNx (b), and LCNx (c).

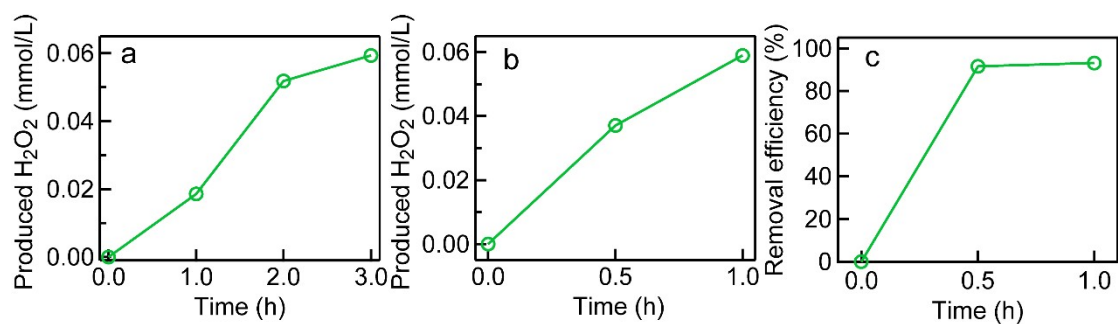

**Fig. S9** The photocatalytic  $H_2O_2$  generation reaction with different oxidation reactions. (a) Photocatalytic  $H_2O_2$  generation proceeded in pure water. (b) Photocatalytic  $H_2O_2$  generation proceeded in MB solution. (c) MB removal efficiency during  $H_2O_2$  generation process.

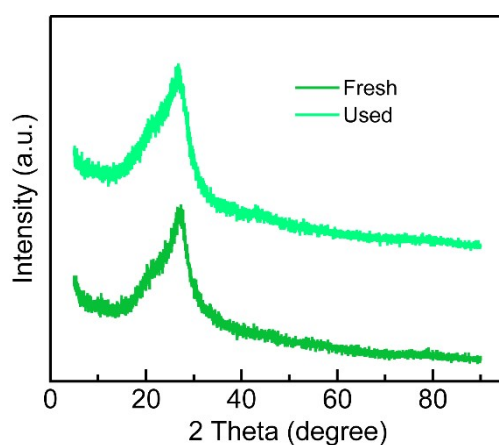

**Fig. S10** XRD patterns of the fresh and used CCN sample.

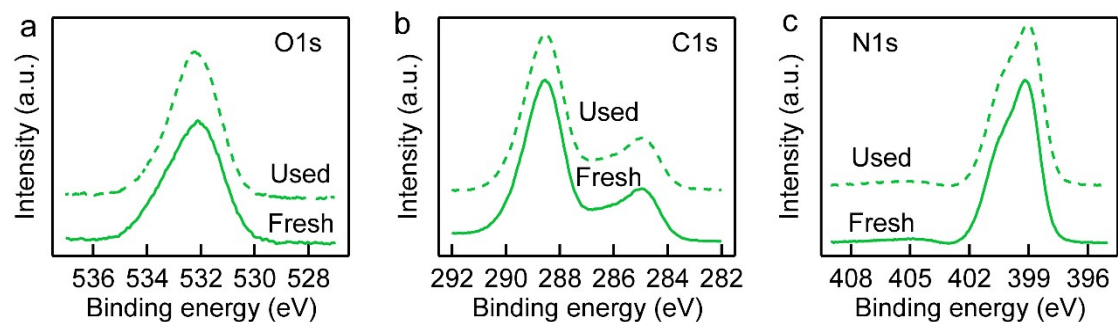

**Fig. S11** High-resolution O1s (a), C1s (b) and N1s (c) spectra of the fresh and used CCN sample.

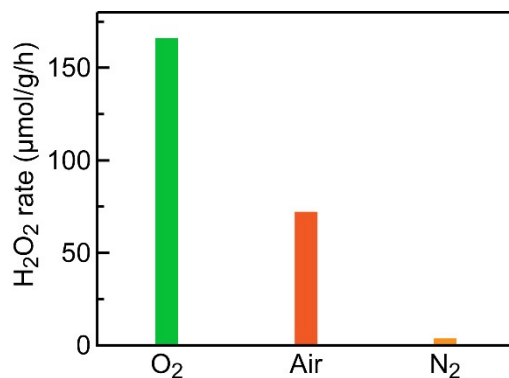

**Fig. S12** The photocatalytic H<sub>2</sub>O<sub>2</sub> generation of CCN measured under different atmosphere.

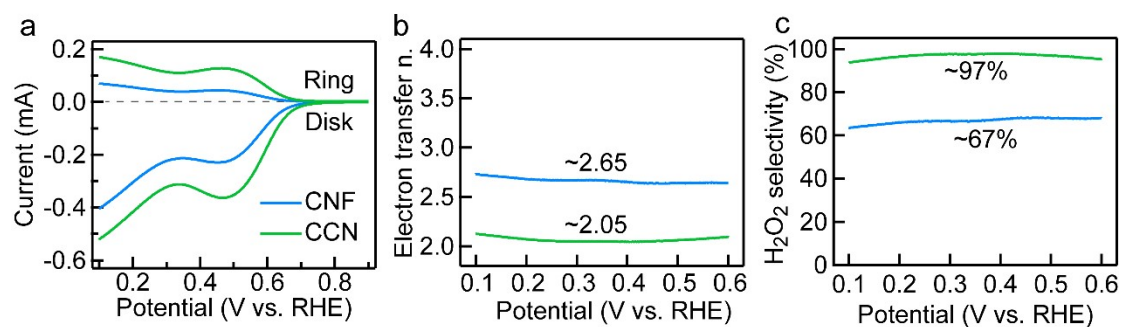

**Fig. S13** RRDE measurements of CNF and CCN. (a) RRDE polarization curves in O<sub>2</sub>-saturated 0.1 M KOH solution. (b) Electron transfer number and (c) H<sub>2</sub>O<sub>2</sub> selectivity calculated from the polarization curves.

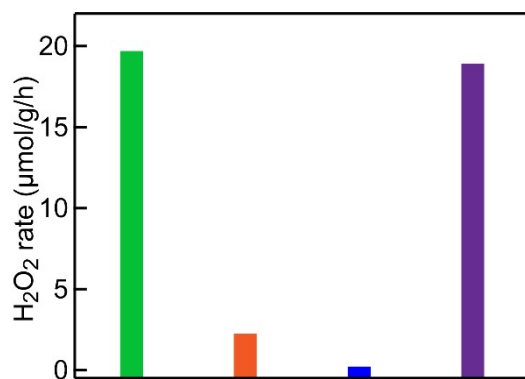

**Fig. S14** The photocatalytic H<sub>2</sub>O<sub>2</sub> generation rate of CCN in the presence of different

trapping agents.

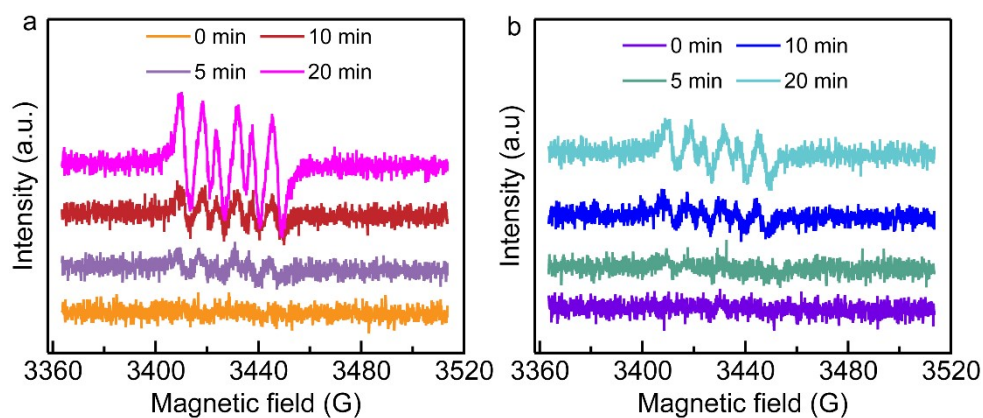

**Fig. S15** Detection of  $\cdot\text{O}_2^-$  over the ACN (a) and LCN (b) samples with different illumination time.

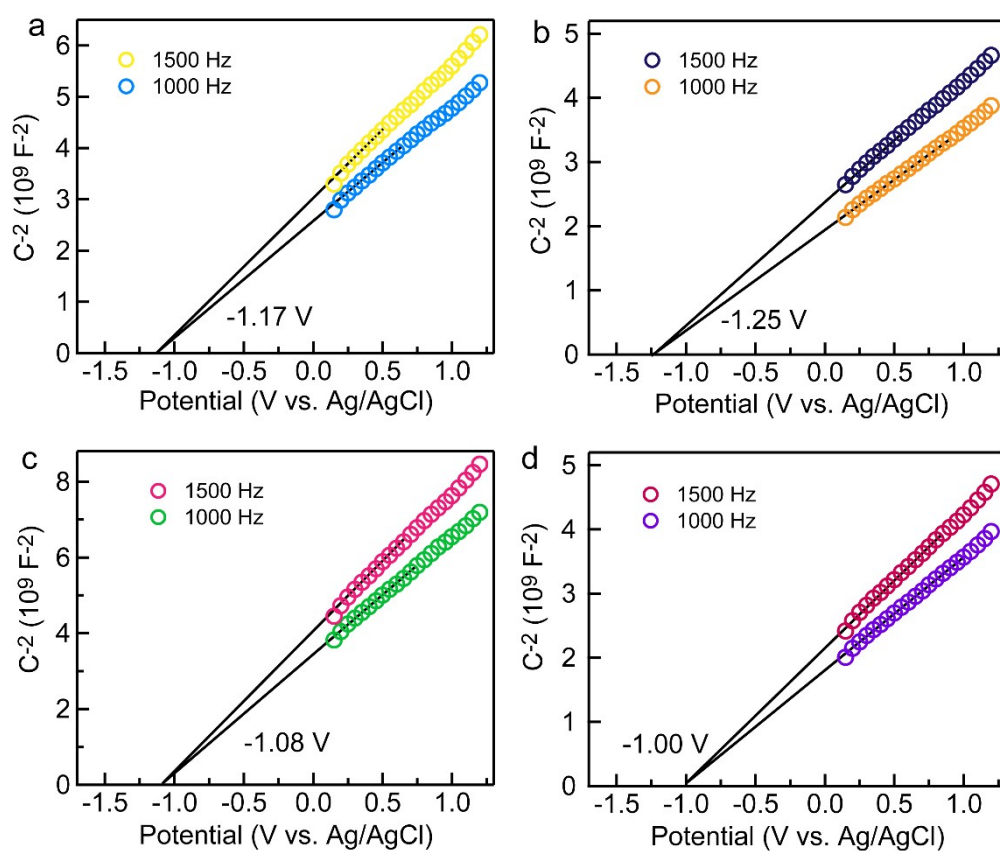

**Fig. S16** Mott-Schottky curves of CNF (a), ACN (b), CCN (c), and LCN (d).

## References

- (S1) Y. J. Cui, Z. X. Ding, X. Z. Fu and X. C. Wang, *Angew. Chem., Int. Ed.*, 2012, **51**, 11814–11818.
- (S2) S. J. Hong, S. Lee, J. S. Jang, and J. S. Lee, *Energy Environ. Sci.*, 2011, **4**, 1781–1787.
- (S3) W. J. Li, P. M. Da, Y. Y. Zhang, Y. C. Wang, X. Lin, X. G. Gong, and G. F. Zheng, *ACS Nano*, 2014, **8**, 11770–11777.
- (S4) C. J. Li, Q. Z. Zheng, Q. Xiang, L. Yu, P. Chen, D. M. Gao, Q. S. Liu, F. L. He, D. M. Yu, Y. P. Liu, C. G. Chen, *J. Chem. Educ.*, 2021, **98**, 3026–3031.
- (S5) X. Zhang, P. J. Ma, C. Wang, L. Y. Gan, X. J. Chen, P. Zhang, Y. Wang, H. Li, L. H. Wang, X. Y. Zhou, K. Zheng, *Energy Environ. Sci.*, 2022, **15**, 830.
